# Supplementary material for: Dimension reduction and shrinkage methods for high dimensional disease risk scores in historical data
Source: Springer Nature journal article supplement (doi:10.1186/s12982-016-0047-x), 2016-04-05
Supplement: MOESM1 [file 10027590]

Appendix Table I. Claims Codes Used to Identify Patients With Valvulopathy

|                                                                     |                      |
|---------------------------------------------------------------------|----------------------|
| Diseases of mitral valve                                            | ICD9 diagnosis 394.x |
| Diseases of aortic valve                                            | ICD9 diagnosis 395.x |
| Diseases of mitral and aortic valve                                 | ICD9 diagnosis 396.x |
| Diseases of endocardial structures                                  | ICD9 diagnosis 397.x |
| Other and unspecified rheumatic heart diseases                      | ICD9 diagnosis 398.9 |
| Heart valve replaced by transplant                                  | ICD9 diagnosis V42.2 |
| Heart valve replaced by a mechanical device / prosthesis            | ICD9 diagnosis V43.3 |
| Open heart valvuloplasty without replacement                        | ICD9 procedure 35.1x |
| Replacement of heart valve                                          | ICD9 procedure 35.2x |
| Atrioventricular valve repair                                       | CPT 33660-33665      |
| Aortic valve valvuloplasty                                          | CPT 33400-33403      |
| Mitral valve repair / valvuloplasty / replacement                   | CPT 33420-33430      |
| Valvectomy, tricuspid valve, with cardiopulmonary bypass            | CPT 33460            |
| Tricuspid valve repair / valvuloplasty / replacement                | CPT 33463-33468      |
| Pulmonary valve replacement                                         | CPT 33475            |
| Prosthetic valve dysfunction repair                                 | CPT 33496            |
| Implantation of catheter-delivered prosthetic aortic heart valve    | CPT 0257T            |
| Transthoracic cardiac exposure for catheter-delivered aortic valve; | CPT 0258T, 0259T     |
| Implantation of catheter-delivered prosthetic pulmonary valve       | CPT 0262T            |

Appendix Table II.

## Hospital Discharge Codes For Identification of Major Hemorrhages for Dabigatran Study

|              | Diagnoses                                                                                                                             | Code                              |
|--------------|---------------------------------------------------------------------------------------------------------------------------------------|-----------------------------------|
| Major        | Intracranial hemorrhage                                                                                                               | 430.x                             |
| Intracranial | Intracerebral hemorrhage                                                                                                              | 431.x                             |
| Bleed        | Other and unspecified intracranial hemorrhage                                                                                         | 432.x                             |
| Major        | Gastric ulcer with hemorrhage                                                                                                         | 531.0x, 2x, 4x, 6x                |
| Gastro-      | Duodenal ulcer with hemorrhage                                                                                                        | 532.0x, 2x, 4x, 6x                |
| intestinal   | Peptic ulcer, site unspecified, with hemorrhage                                                                                       | 533.0x, 2x, 4x, 6x                |
| Bleed        | Gastrojejunal ulcer with hemorrhage                                                                                                   | 534.0x, 2x, 4x, 6x                |
|              | Diverticula of small intestine with hemorrhage                                                                                        | 562.02, 562.03                    |
|              | Diverticula of colon with hemorrhage                                                                                                  | 562.12, 13                        |
|              | Hemorrhage of rectum and anus                                                                                                         | 569.3x                            |
|              | Gastrointestinal hemorrhage                                                                                                           | 578.x                             |
|              | Procedures codes for endoscopic control of gastric or duodenal bleeding, or upper gastrointestinal endoscopy with control of bleeding | ICD-9 44.43,<br>CPT code 43225    |
| Major        | Hematuria                                                                                                                             | 599.7                             |
| urogenital   | Excessive or frequent menstruation (with anemia)                                                                                      | 626.2 with 280.0,<br>285.1, 285.9 |
| bleed        |                                                                                                                                       |                                   |
| Other major  | Hemarthrosis                                                                                                                          | 719.1x                            |
| bleeds       | Hemopericardium                                                                                                                       | 423.0                             |
|              | Hemoptysis, Epistaxis                                                                                                                 | 786.3x, 784.7x                    |
|              | Acute posthemorrhagic anemia                                                                                                          | 285.1x                            |
|              | Hemorrhage, unspecified                                                                                                               | 459.0x                            |

Appendix Table III.

A) Predefined Predictive Factors of Gastrointestinal Bleeding For the Coxib Study

|                       |                                 |
|-----------------------|---------------------------------|
| Comorbidities         | Chronic heart failure           |
|                       | Hypertension                    |
|                       | Recent myocardial infarction    |
|                       | Old myocardial infarction       |
|                       | Peripheral vascular disease     |
|                       | Prior stroke                    |
|                       | Prior transient ischemic attack |
|                       | Chronic kidney disease          |
|                       | Osteoarthritis                  |
|                       | Rheumatoid arthritis            |
|                       | Prior gastrointestinal disease  |
| Concurrent medication | Warfarin                        |
|                       | Gastroprotective agents         |
|                       | Clopidogrel                     |
| Health services use   | Corticocorticoid                |
|                       | Hospital admission              |
|                       | Nursing home stays              |
|                       | Number of MD visits             |
|                       | Number of Medications used      |

B) Predefined Predictive Factors of Major Hemorrhagic Events for the Dabigatran Study

|                       |                                                  |
|-----------------------|--------------------------------------------------|
| Comorbidities         | Chronic kidney disease                           |
|                       | Hypertension                                     |
|                       | Gastrointestinal bleeding (hospitalization)      |
|                       | Gastrointestinal bleeding (outpatient diagnosis) |
|                       | Peripheral artery disease                        |
|                       | Anemia                                           |
|                       | Chronic liver disease                            |
|                       | Alcohol abuse                                    |
| Concurrent medication | Drug abuse                                       |
|                       | nsNSAIDs / coxibs                                |
|                       | Antiplatelets                                    |
