# Supplementary material for: Dimension reduction and shrinkage methods for high dimensional disease risk scores in historical data
Source: Springer Nature journal article supplement (doi:10.1186/s12982-016-0047-x), 2016-04-05
Supplement: MOESM2 [file 10027590]

# Appendix eFigure.

## Calibration Plots for Selected Models from dabigatran study

Demographics + HASBLED score  
[model 2]

Demographics +500 empirical covariates  
[model 4]

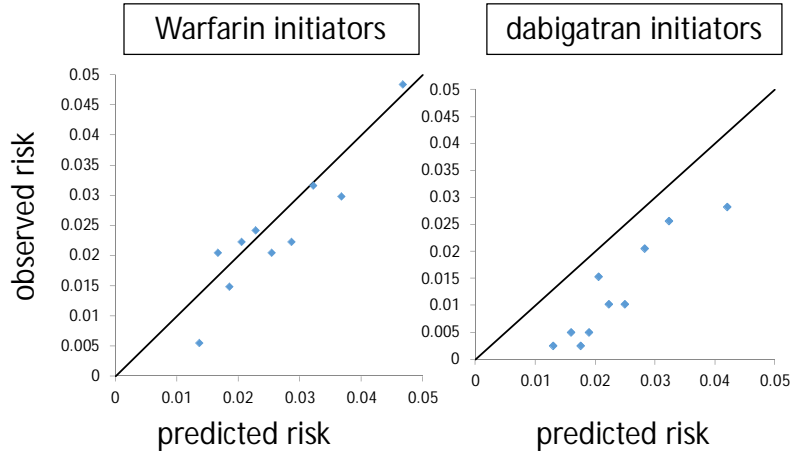

C-stats: 0.62  
HL: 5.6 (p-value=0.69)

C-stats: 0.70  
HL: 24.6 (p-value<.01)

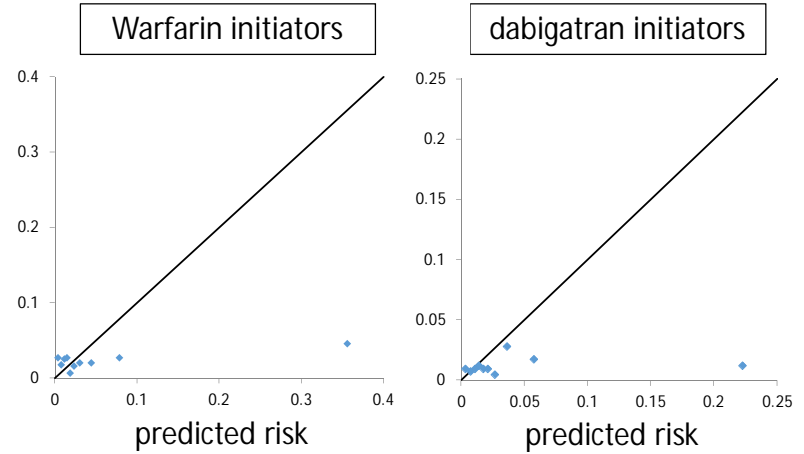

C-stats: 0.54  
HL: 384 (p-value<.01)

C-stats: 0.56  
HL: 126 (p-value<.01)

Demographics + PCA(10)  
[model 5]

lasso(demographics + score + predefined variables +PCA(30)) [model 14]

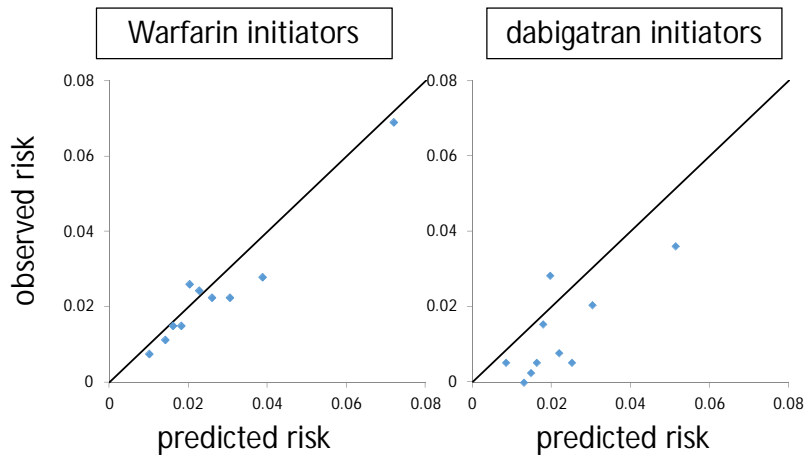

C-stats: 0.66  
HL: 5.2 (p-value=0.73)

C-stats: 0.68  
HL: 27.0 (p-value<.01)

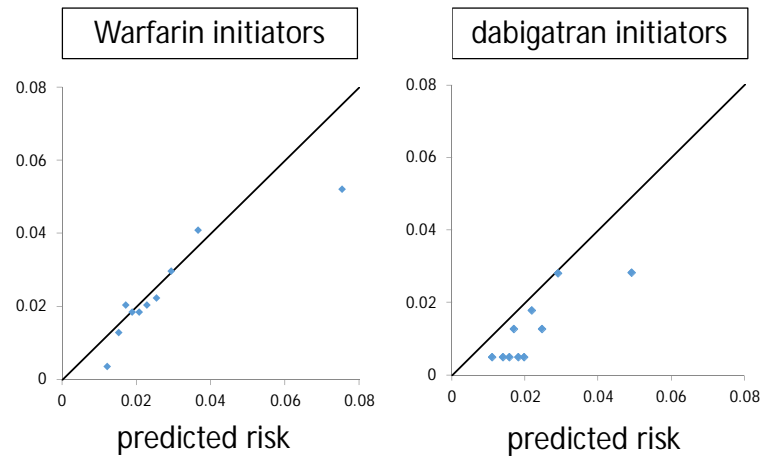

C-stats: 0.65  
HL: 10.7 (p-value=0.22)

C-stats: 0.67  
HL: 19.5 (p-value=.01)
